# Supplementary material for: Marine and Freshwater Sounds Impact Invertebrate Behavior and Physiology: A Meta‐Analysis
Source: PubMed Central journal article supplement — Glob Chang Biol. 2024 Nov 25;30(11):e17593. doi: 10.1111/gcb.17593 (PMC11586707; doi:10.1111/gcb.17593), 2024-11-25
Supplement: GCB-30-e17593-s001.pdf [file GCB-30-e17593-s001.pdf]

# Marine and freshwater sounds impact invertebrate behaviour and physiology: A meta-analysis

Supplementary file: Supplemental Tables S1–S7 and Supplemental Figures S1–S5

Journal name: *Global Change Biology*

Hailey L. Davies\*, Kieran D. Cox\*, Kelsie A. Murchy, Hailey M. Shafer, Audrey Looby, Francis Juanes

\*Correspondence to Hailey L. Davies and Kieran D. Cox

Email: [hldavies@uvic.ca](mailto:hldavies@uvic.ca) and [kcox@uvic.ca](mailto:kcox@uvic.ca)

ORCID: [orcid.org/0000-0002-2110-2861](https://orcid.org/0000-0002-2110-2861) and [orcid.org/0000-0001-5626-1048](https://orcid.org/0000-0001-5626-1048)

Department of Biology, University of Victoria, 3800 Finnerty Rd, Victoria, British Columbia, V8P 5C2, Canada.

Department of Biological Sciences, Simon Fraser University, 8888 University Dr W, Burnaby, British Columbia, V5A 1S6, Canada.

Hakai Institute, Heriot Bay, British Columbia, V0P 1H0, Canada.

## Table of Contents

Page 1: Title page

Page 2: Table S1

Page 6: Table S2

Page 7: Table S3

Page 10: Table S4

Page 10: Table S5

Page 11: Table S6

Page 12: Table S7

Page 13: Figure S1

Page 14: Figure S2

Page 15: Figure S3

Page 16: Figure S4

Page 17: Figure S5

**Table S1.** Peer-reviewed studies included in this meta-analysis, and the associated number of data points derived from each study, addressing invertebrate a) behaviour and b) physiology. Five studies addressing both behavioural and physiological responses are listed in both tables (Celi et al., 2013; Jolivet et al., 2016; Kunc et al., 2014; Peng et al., 2016; Wale et al., 2019).

**a) Behaviour**

| <b>Authors</b>                | <b>Study title</b>                                                                                                                                                     | <b>Data points</b> |
|-------------------------------|------------------------------------------------------------------------------------------------------------------------------------------------------------------------|--------------------|
| Anderson et al. 2021          | Response of fish and invertebrate larvae to backreef sounds at varying distances: implications for habitat restoration                                                 | 20                 |
| Andriguetto-Filho et al. 2005 | Evaluating the impact of seismic prospecting on artisanal shrimp fisheries                                                                                             | 2                  |
| Celi et al. 2013              | Physiological and agonistic behavioural response of <i>Procambarus clarkii</i> to an acoustic stimulus                                                                 | 8                  |
| Charifi et al. 2018           | Noise pollution limits metal bioaccumulation and growth rate in a filter feeder, the Pacific oyster <i>Magallana gigas</i>                                             | 6                  |
| Filiciotto et al. 2018        | Are semi-terrestrial crabs threatened by human noise? Assessment of behavioural and biochemical responses of <i>Neohelice granulata</i> (Brachyura, Varunidae) in tank | 2                  |
| Hubert et al. 2018            | Effects of broadband sound exposure on the interaction between foraging crab and shrimp – A field study                                                                | 4                  |
| Hubert et al. 2022            | Responsiveness and habituation to repeated sound exposures and pulse trains in blue mussels                                                                            | 22                 |
| Hudson et al. 2022            | Potential impacts from simulated vessel noise and sonar on commercially important invertebrates                                                                        | 8                  |
| Hughes et al. 2014            | Predatory fish sounds can alter crab foraging behaviour and influence bivalve abundance                                                                                | 4                  |
| Jolivet et al. 2016           | Validation of trophic and anthropic underwater noise as settlement trigger in blue mussels                                                                             | 1                  |
| Kunc et al. 2014              | Anthropogenic noise affects behavior across sensory modalities                                                                                                         | 2                  |
| Lagardère 1982                | Effects of noise on growth and reproduction of <i>Crangon crangon</i> in rearing tanks                                                                                 | 12                 |

|                       |                                                                                                                                                                                                          |    |
|-----------------------|----------------------------------------------------------------------------------------------------------------------------------------------------------------------------------------------------------|----|
| Lecchini et al. 2018  | Boat noise prevents soundscape-based habitat selection by coral planulae                                                                                                                                 | 30 |
| Lillis et al. 2013    | Oyster larvae settle in response to habitat-associated underwater sounds                                                                                                                                 | 4  |
| Lillis et al. 2015    | Soundscape manipulation enhances larval recruitment of a reef-building mollusk                                                                                                                           | 8  |
| Peng et al. 2016      | Effects of anthropogenic sound on digging behavior, metabolism, Ca <sup>2+</sup> /Mg <sup>2+</sup> ATPase activity, and metabolism-related gene expression of the bivalve <i>Sinonovacula constricta</i> | 6  |
| Roberts & Laidre 2019 | Finding a home in the noise: cross-modal impact of anthropogenic vibration on animal search behaviour                                                                                                    | 1  |
| Stanley et al. 2014   | Fouling in your own nest: vessel noise increases biofouling                                                                                                                                              | 18 |
| Stocks et al. 2012    | Response of marine invertebrate larvae to natural and anthropogenic sound: a pilot study                                                                                                                 | 10 |
| Tidau & Briffa 2019   | Distracted decision makers: ship noise and predation risk change shell choice in hermit crabs                                                                                                            | 2  |
| Wale et al. 2013b     | Noise negatively affects foraging and antipredator behaviour in shore crabs                                                                                                                              | 3  |
| Wale et al. 2019      | From DNA to ecological performance: effects of anthropogenic noise on a reef-building mussel                                                                                                             | 2  |

## b) Physiology

| Authors            | Study title                                                                                            | Data points |
|--------------------|--------------------------------------------------------------------------------------------------------|-------------|
| Carter et al. 2020 | Ship noise inhibits colour change, camouflage, and anti-predator behaviour in shore crabs              | 2           |
| Celi et al. 2013   | Physiological and agonistic behavioural response of <i>Procambarus clarkii</i> to an acoustic stimulus | 10          |
| Celi et al. 2015   | Shipping noise affecting immune responses of European spiny lobster ( <i>Palinurus elephas</i> )       | 5           |

|                         |                                                                                                                                                                                                          |     |
|-------------------------|----------------------------------------------------------------------------------------------------------------------------------------------------------------------------------------------------------|-----|
| Day et al. 2016         | Seismic air gun exposure during early-stage embryonic development does not negatively affect spiny lobster <i>Jasus edwardsii</i> larvae (Decapoda:Palinuridae)                                          | 15  |
| Day et al. 2017         | Exposure to seismic air gun signals causes physiological harm and alters behavior in the scallop <i>Pecten fumatus</i>                                                                                   | 38  |
| Day et al. 2019         | Seismic air guns damage rock lobster mechanosensory organs and impair righting reflex                                                                                                                    | 44  |
| Filiciotto et al. 2014  | Behavioural and biochemical stress responses of <i>Palinurus elephas</i> after exposure to boat noise pollution in tank                                                                                  | 16  |
| Filiciotto et al. 2016  | Underwater noise from boats: measurement of its influence on the behaviour and biochemistry of the common prawn ( <i>Palaemon serratus</i> , Pennant 1777)                                               | 6   |
| Fitzgibbon et al. 2017  | The impact of seismic air gun exposure on the haemolymph physiology and nutritional condition of spiny lobster, <i>Jasus edwardsii</i>                                                                   | 223 |
| Hudson et al. 2022      | Potential impacts from simulated vessel noise and sonar on commercially important invertebrates                                                                                                          | 32  |
| Jolivet et al. 2016     | Validation of trophic and anthropic underwater noise as settlement trigger in blue mussels                                                                                                               | 4   |
| Kunc et al. 2014        | Anthropogenic noise affects behavior across sensory modalities                                                                                                                                           | 1   |
| McCauley et al. 2017    | Widely used marine seismic survey air gun operations negatively impact zooplankton                                                                                                                       | 6   |
| Nedelec et al. 2014     | Anthropogenic noise playback impairs embryonic development and increases mortality in a marine invertebrate                                                                                              | 2   |
| Pearson et al. 1994     | Effects of seismic energy release on the survival and development of zoeal larvae of Dungeness Crab ( <i>Cancer magister</i> )                                                                           | 15  |
| Peng et al. 2016        | Effects of anthropogenic sound on digging behavior, metabolism, Ca <sup>2+</sup> /Mg <sup>2+</sup> ATPase activity, and metabolism-related gene expression of the bivalve <i>Sinonovacula constricta</i> | 28  |
| Przeslawski et al. 2018 | Multiple field-based methods to assess the potential impacts of seismic surveys on scallops                                                                                                              | 18  |

|                           |                                                                                                                                                             |    |
|---------------------------|-------------------------------------------------------------------------------------------------------------------------------------------------------------|----|
| Regnault & Lagardère 2018 | Effects of ambient noise on the metabolic level of <i>Crangon crangon</i> (Decapoda, Natantia)                                                              | 18 |
| Ren et al. 2021           | Music stimulus has a positive effect on survival and development of the larvae in swimming crab <i>Portunus trituberculatus</i>                             | 45 |
| Shi et al. 2019           | Anthropogenic noise aggravates the toxicity of cadmium on some physiological characteristics of the blood clam <i>Tegillarca granosa</i>                    | 28 |
| Solé et al. 2016          | Evidence of cnidarians sensitivity to sound after exposure to low frequency underwater sources                                                              | 2  |
| Solé et al. 2017          | Offshore exposure experiments on cuttlefish indicate received sound pressure and particle motion levels associated with acoustic trauma                     | 1  |
| Solé et al. 2018          | A critical period of susceptibility to sound in the sensory cells of cephalopod hatchlings                                                                  | 12 |
| Solé et al. 2019          | A proteomic analysis of the statocyst endolymph in common cuttlefish ( <i>Sepia officinalis</i> ): an assessment of acoustic trauma after exposure to sound | 2  |
| Solé et al. 2021          | An acoustic treatment to mitigate the effects of the Apple Snail on agriculture and natural ecosystems                                                      | 1  |
| Tu et al. 2021            | Transcriptome analysis of the central nervous system of sea slug ( <i>Onchidium reevesii</i> ) exposed to low-frequency noise                               | 30 |
| Vazzana et al. 2020       | Underwater high frequency noise: biological responses in sea urchin <i>Arbacia lixula</i> (Linnaeus, 1758)                                                  | 8  |
| Wale et al. 2013a         | Size-dependent physiological responses of shore crabs to single and repeated playback of ship noise                                                         | 8  |
| Wale et al. 2019          | From DNA to ecological performance: effects of anthropogenic noise on a reef-building mussel                                                                | 8  |
| Zhao et al. 2021          | Mussel byssal attachment weakened by anthropogenic noise                                                                                                    | 32 |

**Table S2.** The broader sound source categories used in this meta-analysis, as well as the specific sound sources included within these, the number of studies, and number of data points. The categories are divided into the two main response types: a) behaviour and b) physiology.

**a) Behaviour**

| <b>Sound category</b> | <b>Sound source</b> | <b>Studies</b> | <b>Data</b> |
|-----------------------|---------------------|----------------|-------------|
| Anthropogenic noise   | Pile driving        | 1              | 1           |
|                       | Seismic surveys     | 2              | 6           |
|                       | Shipping noise      | 10             | 49          |
|                       | Tank noise          | 1              | 12          |
| Environmental sounds  | Animal bioacoustics | 1              | 4           |
|                       | Environmental       | 5              | 61          |
| Synthetic sounds      | Linear sweep        | 1              | 8           |
|                       | Tone                | 3              | 28          |
|                       | White noise         | 2              | 6           |

**b) Physiology**

| <b>Sound category</b> | <b>Sound source</b> | <b>Studies</b> | <b>Data</b> |
|-----------------------|---------------------|----------------|-------------|
| Anthropogenic noise   | Pile driving        | 2              | 60          |
|                       | Seismic surveys     | 8              | 375         |
|                       | Shipping noise      | 10             | 68          |
|                       | Tank noise          | 1              | 18          |
| Music                 | Music               | 1              | 45          |
| Synthetic sounds      | Linear sweep        | 2              | 18          |
|                       | Tone                | 6              | 48          |
|                       | White noise         | 1              | 28          |

**Table S3.** The specific responses and number of data points within each meta-analytic multivariate mixed-effects model variable. The variables are divided into the two main response types: a) behaviour and b) physiology.

**a) Behaviour**

| <b>Model variable</b> | <b>Responses</b>                                                                                                                                                                                                                                                                                                                    | <b>Data</b> |
|-----------------------|-------------------------------------------------------------------------------------------------------------------------------------------------------------------------------------------------------------------------------------------------------------------------------------------------------------------------------------|-------------|
| Bioacoustics          | Acoustic emissions (i.e., crab sound production)                                                                                                                                                                                                                                                                                    | 2           |
| Defence               | Bivalve gape (i.e., amount, cadmium concentration as bivalve gape proxy, fraction of bivalves open, time open), digging depth (i.e., of clams), fights (i.e., with other crayfish), hiding time, raised arms (i.e., frequency), righting time, shell decision time (i.e., accept/reject hermit crab shells), sheltering, tail flips | 49          |
| Foraging              | Foraging (i.e., clams consumed), foraging time, monthly consumption, number foraging, number near food source                                                                                                                                                                                                                       | 21          |
| Movement              | Activity level (i.e., movement into and out of circles, velocity), chemical cue attraction (i.e., number of hermit crabs attracted to a newly available shell), encounters (i.e., with other crayfish), number moving, abundance, time swimming                                                                                     | 22          |
| Recruitment           | Recruitment (i.e., density/direct counts, number of individuals per settlement panel, number of larvae per collector, proportion of larvae settled)                                                                                                                                                                                 | 81          |

**b) Physiology**

| <b>Model variable</b> | <b>Responses</b>                                                                                                                                                                                                                                                                                                                                                                          | <b>Data</b> |
|-----------------------|-------------------------------------------------------------------------------------------------------------------------------------------------------------------------------------------------------------------------------------------------------------------------------------------------------------------------------------------------------------------------------------------|-------------|
| Biochemistry          | ATP content, calorimetry, clearance rate (i.e., of food), enzyme activity, excretion (i.e., ammonia, O:N ratio), heat shock proteins, hemocyte count, hemolymph chemistry (e.g., Cl, K, Na), hemolymph glucose, hemolymph refractive index, hemolymph pH, hemolymph protein, hemolysis, hepatopancreas index, reactive oxygen species, respiration rate (i.e., oxygen), statocyst protein | 430         |
| Defence               | Colour changes (i.e., amount, number)                                                                                                                                                                                                                                                                                                                                                     | 3           |
| Development           | Development failure (i.e., failed eggs, unhatched eggs), development success (i.e., hatched larvae), development time, percent metamorphosis                                                                                                                                                                                                                                              | 28          |
| Genetics              | DNA damage, gene expression                                                                                                                                                                                                                                                                                                                                                               | 62          |

|            |                                                                                                                                                                                                                         |     |
|------------|-------------------------------------------------------------------------------------------------------------------------------------------------------------------------------------------------------------------------|-----|
| Morphology | Body mass, body size (i.e., length, width), byssal thread size, byssal thread strength, condition (i.e., of reproductive organs), hair cell damage (i.e., number of intact hair cells, percent mean damaged hair cells) | 107 |
| Survival   | Survival rate (i.e., cumulative, to stage III or IV larvae, ratio of dead/total zooplankton)                                                                                                                            | 30  |



**Table S4.** Structure of the meta-analytic multivariate mixed-effects response models for each behavioural and physiological response type and sound source category, including the Box Cox transformation value, fixed effect, random effect (data point ID or data point ID nested within study), and exclusion of response categories (due to the exclusion condition of studies with less than three data points).

| <b>Response type</b> | <b>Sound</b>  | <b>Transform</b> | <b>Fixed</b>  | <b>Random</b> | <b>Exclusion</b> |
|----------------------|---------------|------------------|---------------|---------------|------------------|
| Behaviour            | Anthropogenic | 0.700            | Response type | Study / ID    | -                |
|                      | Environmental | 0.869            | Response type | Study / ID    | -                |
|                      | Synthetic     | 0.636            | Response type | Study / ID    | Bioacoustics     |
| Physiology           | Anthropogenic | 1.600            | Response type | Study / ID    | -                |
|                      | Music         | 0.465            | Response type | ID            | -                |
|                      | Synthetic     | 1.400            | Response type | Study / ID    | -                |

**Table S5.** Meta-analytic multivariate mixed-effect response model outputs quantifying the impacts of each sound source category on aquatic invertebrate a) behavioural and b) physiological responses. Behavioural models included response as a fixed effect and data point ID nested within study as a random effect. The number of studies included in each behavioural model were 13 for anthropogenic, 6 for environmental, and 5 for synthetic. For physiological models, anthropogenic noise and synthetic sound included response as a fixed effect and data point ID nested within study as a random effect, and music included response as a fixed effect and data point ID as a random effect. The number of studies included in each physiological model were 20 for anthropogenic, 1 for music, and 9 for synthetic. Standard error is represented as SE, confidence intervals include the lower (Low CI) and upper (Up CI) bounds, and significant p-values are bolded ( $p < 0.05$ ).

**a) Behaviour**

| Sound         | Response    | Estimate | SE   | z-value | p-value      | Low CI | Up CI |
|---------------|-------------|----------|------|---------|--------------|--------|-------|
| Anthropogenic | Defence     | -0.60    | 0.22 | -2.72   | <b>0.007</b> | -1.03  | -0.17 |
|               | Foraging    | -0.08    | 0.37 | 0.20    | 0.841        | -0.66  | 0.81  |
|               | Movement    | -0.44    | 0.23 | -1.95   | 0.051        | -0.88  | 0.00  |
|               | Recruitment | 0.50     | 0.38 | 1.30    | 0.192        | -0.25  | 1.24  |
| Environmental | Foraging    | -0.07    | 0.25 | -0.27   | 0.789        | -0.55  | 0.42  |
|               | Movement    | 0.09     | 0.14 | 0.63    | 0.529        | -0.18  | 0.36  |
|               | Recruitment | 0.10     | 0.09 | 1.19    | 0.236        | -0.07  | 0.27  |
| Synthetic     | Defence     | -0.37    | 0.17 | -2.15   | <b>0.032</b> | -0.72  | -0.03 |
|               | Foraging    | -0.07    | 0.35 | -0.21   | 0.831        | -0.76  | 0.61  |
|               | Movement    | -0.23    | 0.45 | -0.51   | 0.598        | -1.10  | 0.65  |

**b) Physiology**

| Sound         | Response     | Estimate | SE   | z-value | p-value           | Low CI | Up CI |
|---------------|--------------|----------|------|---------|-------------------|--------|-------|
| Anthropogenic | Biochemistry | -2.06    | 0.61 | -3.38   | <b>0.001</b>      | -3.26  | -0.87 |
|               | Defence      | -2.04    | 1.92 | -1.06   | 0.287             | -5.79  | 1.72  |
|               | Development  | -1.45    | 0.93 | -1.55   | 0.122             | -3.28  | 0.39  |
|               | Genetics     | -4.43    | 0.74 | -5.99   | <b>&lt;0.0001</b> | -5.88  | -2.98 |
|               | Morphology   | -1.63    | 0.72 | -2.28   | <b>0.023</b>      | -3.04  | -0.23 |
|               | Survival     | -1.31    | 1.16 | -1.14   | 0.256             | -3.58  | 0.95  |
| Music         | Biochemistry | 0.45     | 0.20 | 2.25    | <b>0.025</b>      | 0.06   | 0.84  |
|               | Development  | 0.16     | 0.18 | 0.85    | 0.395             | -0.20  | 0.52  |
|               | Survival     | 0.33     | 0.20 | 0.68    | 0.094             | -0.06  | 0.71  |
| Synthetic     | Biochemistry | -1.87    | 1.23 | -1.52   | 0.128             | -4.28  | 0.54  |
|               | Genetics     | -4.72    | 1.43 | -3.29   | <b>0.001</b>      | -7.53  | -1.91 |
|               | Morphology   | -5.91    | 1.79 | -3.30   | <b>0.001</b>      | -9.42  | -2.40 |

**Table S6.** Structure of the meta-analytic multivariate mixed-effects taxa models for each behavioural and physiological response type and sound source category, including the Box Cox transformation value, fixed effect, random effect (data point ID or data point ID nested within study), and exclusion of response categories (due to the exclusion condition of studies with less than three data points).

| <b>Response type</b> | <b>Sound</b>  | <b>Transform</b> | <b>Fixed</b> | <b>Random</b> | <b>Exclusion</b>           |
|----------------------|---------------|------------------|--------------|---------------|----------------------------|
| Behaviour            | Anthropogenic | 0.700            | Phylum       | Study / ID    | Annelida,<br>Echinodermata |
|                      | Environmental | 0.869            | Phylum       | Study / ID    | Bryozoa,<br>Echinodermata  |
|                      | Synthetic     | 0.737            | Phylum       | Study / ID    | -                          |
| Physiology           | Anthropogenic | 1.600            | Phylum       | Study / ID    | Zooplankton                |
|                      | Music         | 0.465            | -            | ID            | -                          |
|                      | Synthetic     | 2.400            | Phylum       | Study / ID    | Cnidaria                   |

**Table S7.** Meta-analytic multivariate mixed-effect response taxa model outputs quantifying the impacts of each sound source category on aquatic invertebrate a) behavioural and b) physiological responses. Behavioural models included response as a fixed effect and data point ID nested within study as a random effect. The number of studies included in each behavioural model were 13 for anthropogenic, 6 for environmental, and 5 for synthetic. For physiological models, anthropogenic noise and synthetic sound included response as a fixed effect and data point ID nested within study as a random effect, music included response as a fixed effect and data point ID as a random effect, and natural sounds just included data point ID as a random effect. The number of studies included in each physiological model were 20 for anthropogenic, 1 for music, and 8 for synthetic. Standard error is represented as SE, confidence intervals include the lower (Low CI) and upper (Up CI) bounds, and significant p-values are bolded ( $p < 0.05$ ).

**a) Behaviour**

| Sound         | Response   | Estimate | SE   | z-value | p-value      | Low CI | Up CI |
|---------------|------------|----------|------|---------|--------------|--------|-------|
| Anthropogenic | Arthropoda | -0.30    | 0.25 | -1.23   | 0.218        | -0.79  | 0.18  |
|               | Bryozoa    | -0.18    | 0.53 | -0.33   | 0.738        | -1.21  | 0.86  |
|               | Cnidaria   | -0.52    | 0.65 | -0.79   | 0.429        | -1.79  | 0.76  |
|               | Mollusca   | -0.11    | 0.29 | -0.39   | 0.698        | -0.68  | 0.46  |
| Environmental | Arthropoda | 0.02     | 0.06 | 0.33    | 0.745        | -0.11  | 0.15  |
|               | Cnidaria   | 0.04     | 0.11 | 0.37    | 0.708        | -0.17  | 0.26  |
|               | Mollusca   | 0.10     | 0.05 | 1.94    | 0.053        | -0.00  | 0.20  |
| Synthetic     | Arthropoda | -0.32    | 0.26 | -1.25   | 0.211        | -0.83  | 0.18  |
|               | Mollusca   | -0.48    | 0.22 | -2.17   | <b>0.030</b> | -0.90  | -0.05 |

**b) Physiology**

| Sound         | Response      | Estimate | SE   | z-value | p-value           | Low CI | Up CI |
|---------------|---------------|----------|------|---------|-------------------|--------|-------|
| Anthropogenic | Arthropoda    | -2.00    | 0.72 | -2.79   | <b>0.005</b>      | -3.41  | -0.60 |
|               | Mollusca      | -2.08    | 0.90 | -2.31   | <b>0.021</b>      | -3.85  | -0.31 |
| Music         | Arthropoda    | 0.30     | 0.11 | 2.72    | <b>0.007</b>      | 0.08   | 0.52  |
| Synthetic     | Arthropoda    | -6.02    | 2.66 | -2.26   | <b>0.024</b>      | -11.23 | -0.80 |
|               | Echinodermata | -4.68    | 2.82 | -1.66   | 0.096             | -10.20 | 0.84  |
|               | Mollusca      | -4.96    | 0.93 | -5.35   | <b>&lt;0.0001</b> | -6.78  | -3.14 |

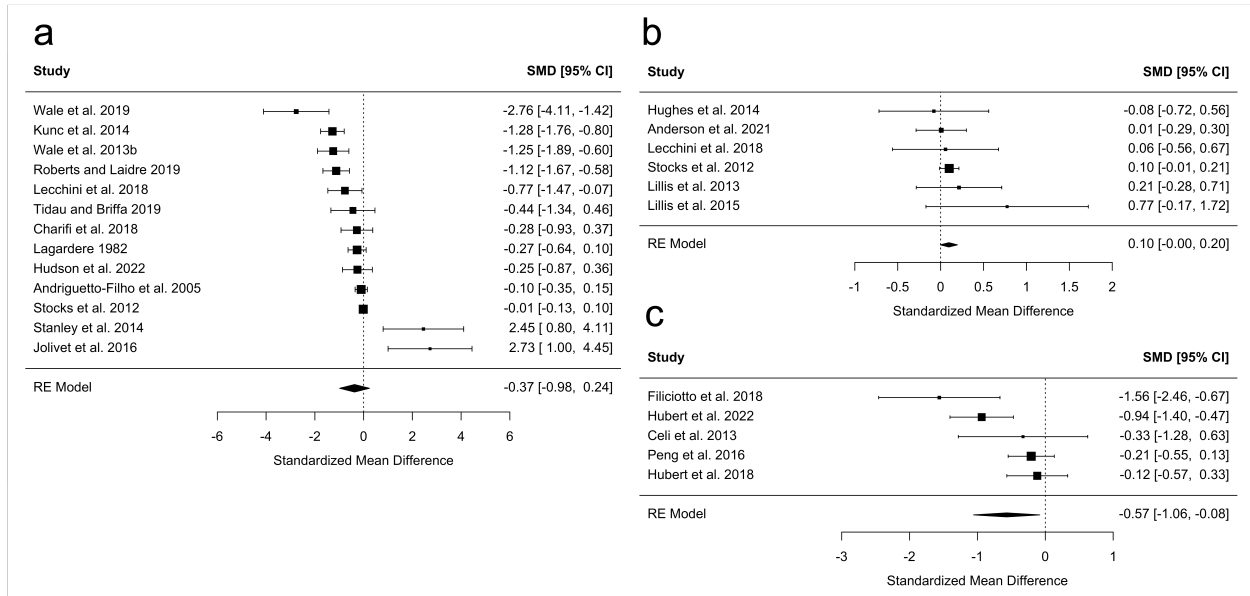

**Figure S1.** Forest plots showing how various types of aquatic sound affected invertebrate behaviour. Studies were divided into the following categories based on sound source: a) anthropogenic noise, b) environmental sounds, and c) synthetic sounds. Authors and publication year are listed with each effect size and 95% confidence intervals. The black squares are the effect sizes, which are scaled based on their weight in the analysis (larger studies have larger points). The diamond at the bottom of each sound source plot illustrates the summary effect (weighted average of individual study effect sizes).

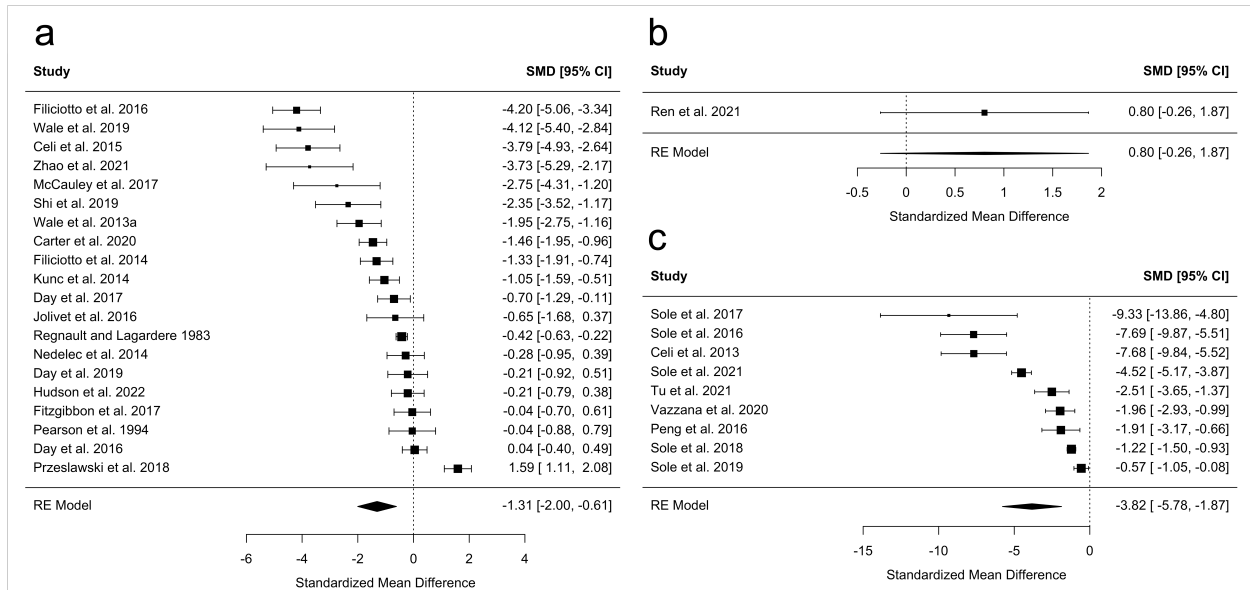

**Figure S2.** Forest plots showing how various types of aquatic sound affected invertebrate physiology. Studies were divided into the following categories based on sound source: a) anthropogenic noise, b) music, and c) synthetic sounds. Authors and publication year are listed with each effect size and 95% confidence intervals. The black squares are the effect sizes, which are scaled based on their weight in the analysis (larger studies have larger points). The diamond at the bottom of each sound source plot illustrates the summary effect (weighted average of individual study effect sizes).

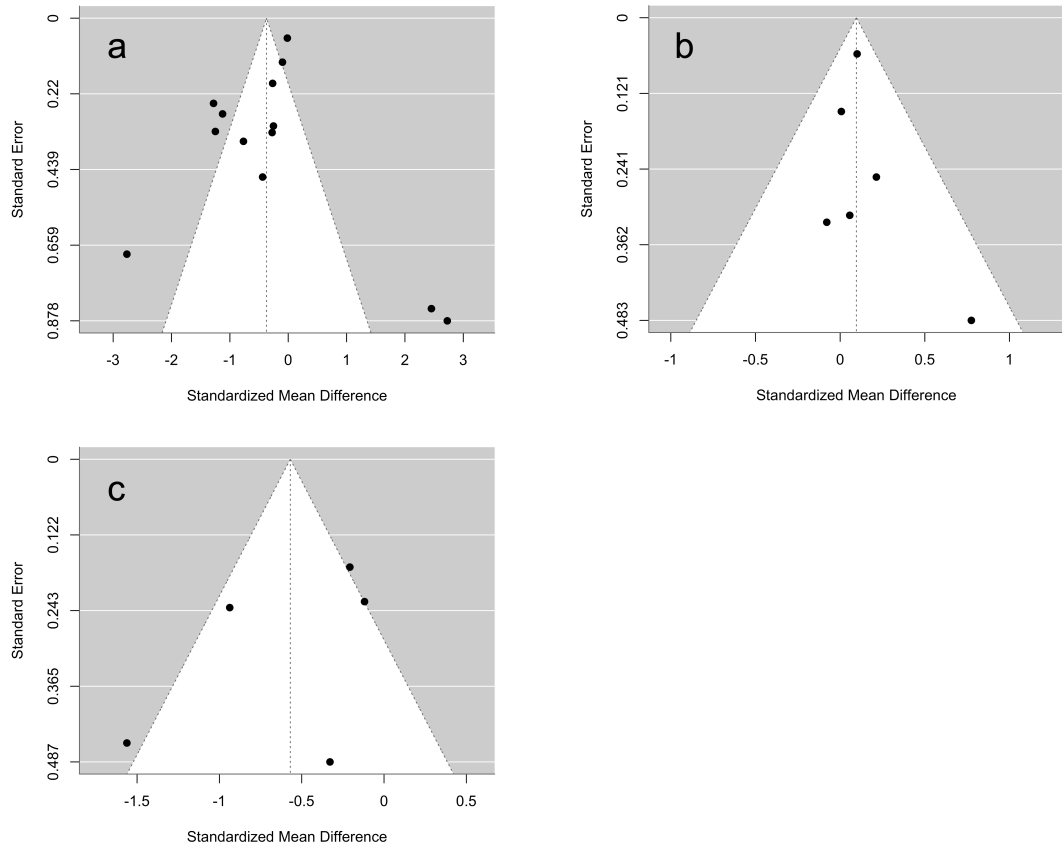

**Figure S3.** Funnel plots examining the presence of publication bias within each sound source category affecting aquatic invertebrate behavioural responses, including a) anthropogenic noise, b) environmental sounds, and c) synthetic sounds.

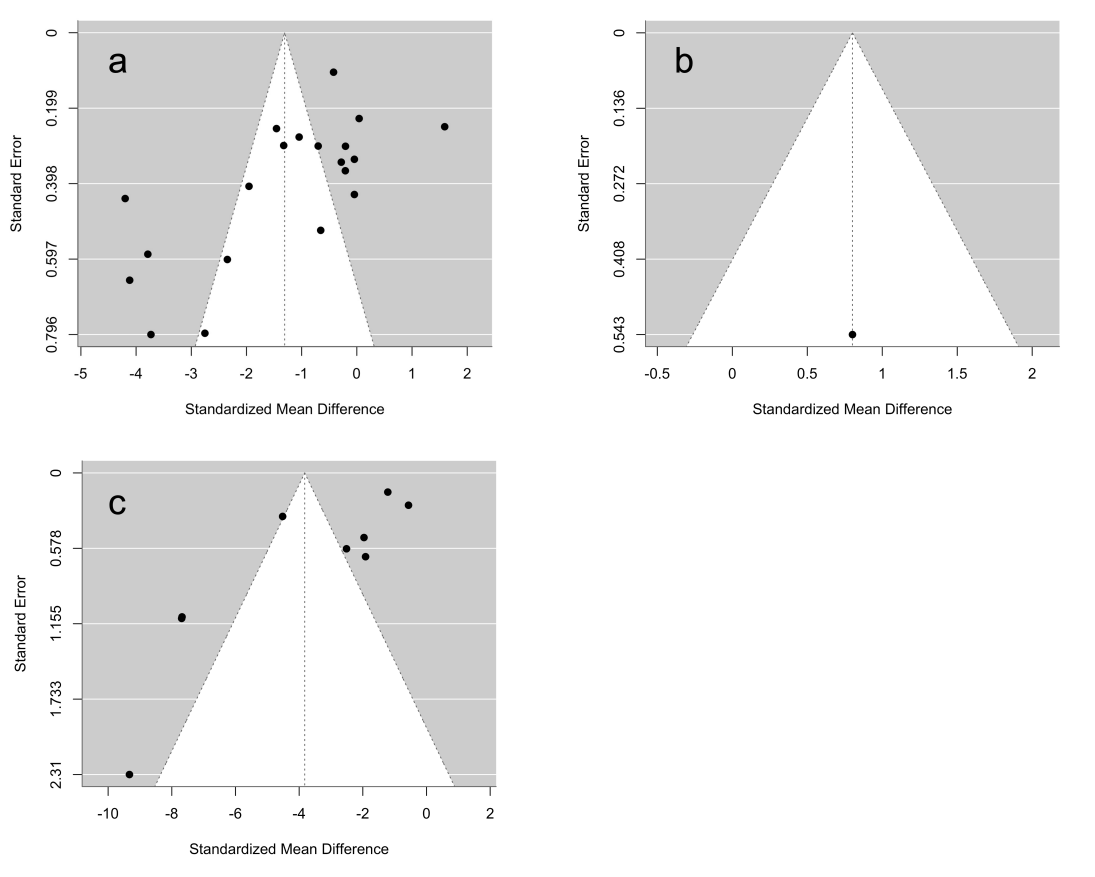

**Figure S4.** Funnel plots examining the presence of publication bias within each sound source category affecting aquatic invertebrate physiological responses, including a) anthropogenic noise, b) music, and c) environmental sounds.



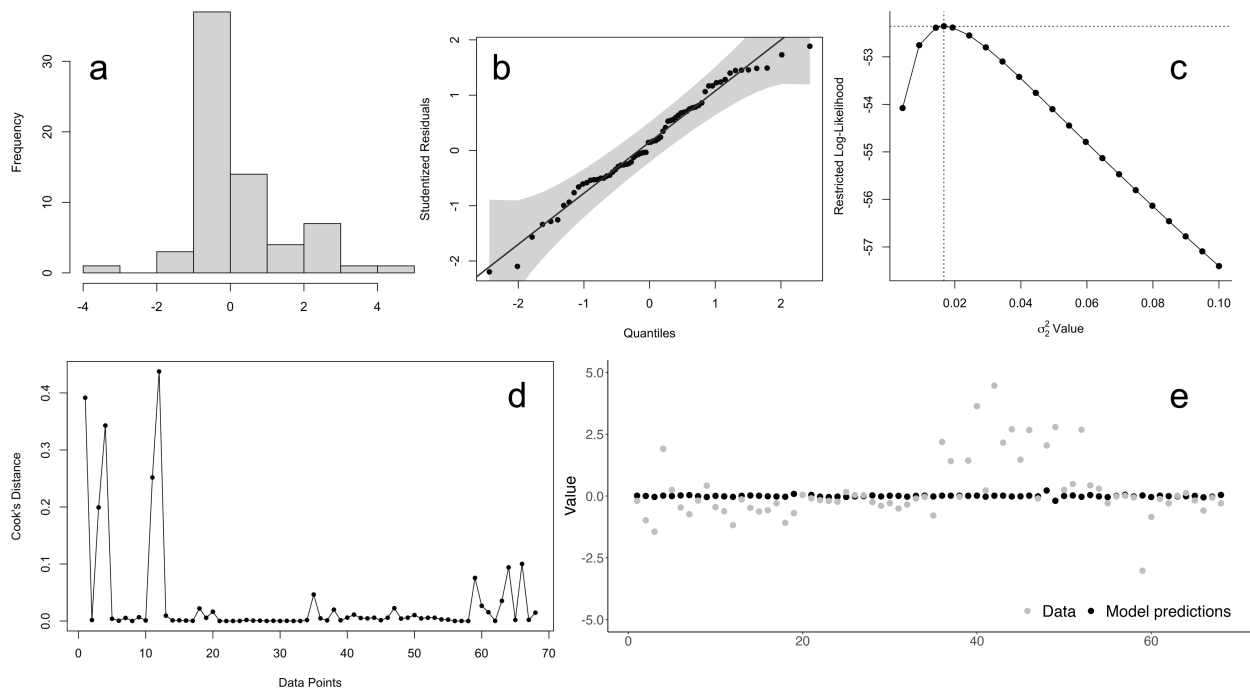

**Figure S5.** An example of the statistical test visualizations used to assess the validity of each meta-analytic multivariate mixed-effects model in this meta-analysis, using the effects of anthropogenic sounds on behavioural response categories model. a) A transform was identified using the Box Cox method and the transformed histogram visually examined. b) Model studentized residuals were examined for normality using a quantile-quantile plot. c) The variance components of the model residuals were examined using a profile likelihood plot. d) The plot of Cook's distance values aided identification of influential data points to be further examined (along with DFBETAS and hat values not shown here). e) A comparison of our data (grey) with the model predictions (black) to visualize how well the model predicted our data (followed by a t-test).
